# Supplementary material for: Effect of Synthesis Method on Reaction Mechanism for Hydrogen Evolution over CuxOy/TiO2 Photocatalysts: A Kinetic Analysis
Source: Int J Mol Sci. 2023 Jan 19;24(3):2004. doi: 10.3390/ijms24032004 (PMC9916258; doi:10.3390/ijms24032004)
Supplement: Supplementary file 1 [file ijms-24-02004-s001.zip › ijms-2123568-supplementary.pdf]

## Supplementary information

# Effect of synthesis method on reaction mechanism for hydrogen evolution over $\text{Cu}_x\text{O}_y/\text{TiO}_2$ photocatalysts: a kinetic analysis

Laura Clarizia <sup>1,\*</sup>, Giuseppe Vitiello <sup>1,2,\*</sup>, Robert Bericat Vadell <sup>3</sup>, Jacinto Sá <sup>3,4</sup>, Raffaele Marotta <sup>1</sup>,  
Ilaria Di Somma <sup>5</sup>, Roberto Andreozzi <sup>1</sup> and Giuseppina Luciani <sup>1</sup>

<sup>1</sup> Department of Chemical, Materials and Industrial Production Engineering,  
University of Naples “Federico II”, p.le V. Tecchio 80, 80125 Napoli, Italy

<sup>2</sup> CSGI, Center for Colloid and Interface Science, via della Lastruccia 3, 50019 Sesto Fiorentino, Italy

<sup>3</sup> Department of Chemistry-Ångström, Physical Chemistry Division, Uppsala University, P.O. Box 532,  
751 20 Uppsala, Sweden

<sup>4</sup> Institute of Physical Chemistry, Polish Academy of Sciences, Kasprzaka 44/52, 01-224 Warsaw, Poland

<sup>5</sup> Istituto di Scienze e Tecnologie per l'Energia e la Mobilità Sostenibili (STEMS)-Consiglio Nazionale delle  
Ricerche, p.le V. Tecchio 80, 80125 Napoli, Italy

\* Correspondence: laura.clarizia2@unina.it (L.C.); giuseppe.vitiello@unina.it (G.V.)

**Table S1.** Effective radiative powers of the medium-pressure mercury lamp (Helios Italquartz).

| $\lambda$<br>(nm) | Effective radiative power<br>(Ein/s) |
|-------------------|--------------------------------------|
| 305               | 2,23E-06                             |
| 313               | 2,76E-06                             |
| 366               | 3,37E-06                             |
| 404,7             | 8,88E-07                             |
| 407,8             | 2,01E-07                             |
| 435,8             | 1,47E-06                             |
| 546,1             | 1,65E-06                             |

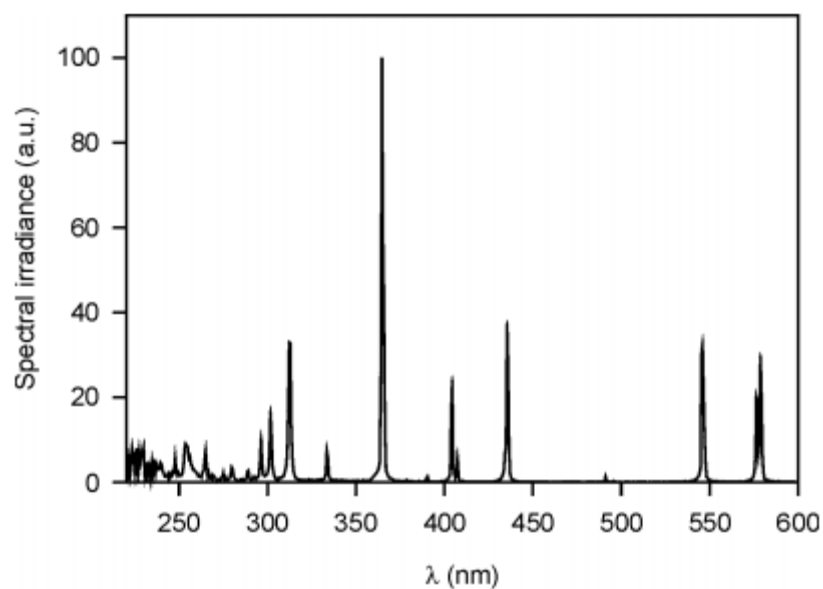

**Figure S1.** The emission spectrum of a medium-pressure mercury lamp Helios Italquartz 125W.

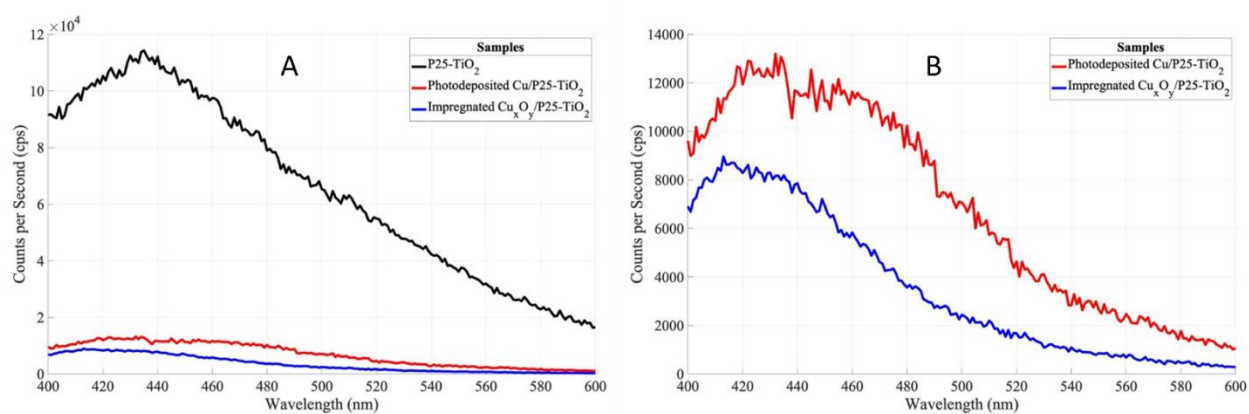

**Figure S2.** PL spectra were measured in degassed pH 4 aqueous solution. P25-TiO<sub>2</sub>\_NPs (black trace). Cu<sub>x</sub>O<sub>y</sub>/TiO<sub>2</sub>-P25\_NPs (blue trace) and Cu/TiO<sub>2</sub>-P25\_NPs (red trace). (A) all the samples; and (B) only copper-modified samples.

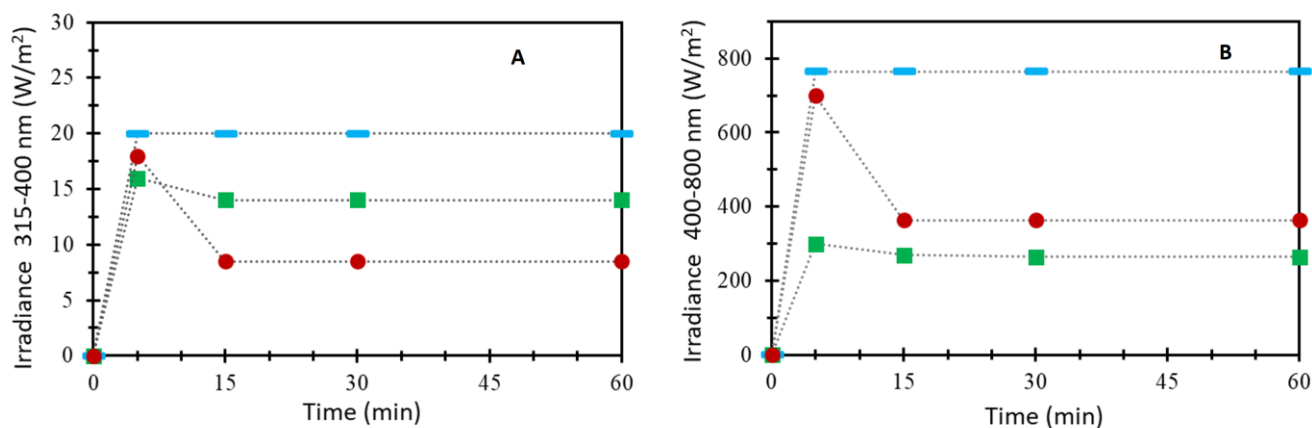

**Figure S3.** Irradiance values measured between (A) 315–400 nm and (B) 400–800 nm for during methanol photoreforming under de-aerated conditions in the presence of Cu/TiO<sub>2</sub>\_NPs prepared via photodeposition (●), Cu<sub>x</sub>O<sub>y</sub>/TiO<sub>2</sub>\_NPs prepared via impregnation method (■), and bare P25-TiO<sub>2</sub>(—).  
Copper/TiO<sub>2</sub> weight ratio=3%; [CH<sub>3</sub>OH]<sub>0</sub>= 2.47 M; photocatalyst load= 150 mg·L<sup>-1</sup>; T=25 °C; P=1 atm.

### Information on the iterative optimisation procedure developed

Values for the unknown parameters ( $k_r$ ,  $N$ , and  $\Phi_{UV}$ ) were estimated by an iterative optimisation procedure (Marquardt approach) that minimised the square of the differences between calculated and measured data for hydrogen generation rate (i.e., objective function)[ Reklaitis GV, Ravindran A, Regsdell KM. Engineering Optimization. Wiley, New York, 1983]:

$$\phi = \sum_{l=1}^m \sum_{j=1}^n \sum_{i=1}^h (y_{i,j,l} - c_{ijl})^2$$

in which the terms  $y$  and  $c$  are the calculated and experimental concentrations, where  $m$ ,  $n$ , and  $h$  are the number of experimental data recorded in each experiment, the number of the involved species and the number of experiments used in the optimisation procedure, respectively.
